# Supplementary material for: Enhancing Double-Beam Laser Tweezers Raman Spectroscopy (LTRS) for the Photochemical Study of Individual Airborne Microdroplets
Source: MDPI journal article supplement (doi:10.3390/molecules24183325), 2019-09-12
Supplement: s1 [file s1]

Article

## Supplementary material

# Enhancing double-beam laser tweezers Raman Spectroscopy (LTRS) for the photochemical study of individual airborne microdroplets

Jovanny A. Gómez Castaño <sup>1,2,\*</sup>, Luc Boussekey <sup>1</sup>, Jean P. Verwaerde <sup>1</sup>, Myriam Moreau <sup>1</sup> and Yeny A. Tobón <sup>1,\*</sup>

<sup>1</sup> Univ. Lille, CNRS, UMR 8516 - LASIR - Laboratoire de Spectrochimie Infrarouge et Raman, F-59000 Lille, France

<sup>2</sup> Laboratorio de Química Teórica y Computacional, Grupo Química-Física Molecular y Modelamiento Computacional (QUIMOL), Facultad de Ciencias, Universidad Pedagógica y Tecnológica de Colombia, Tunja, Boyacá 050030, Colombia; [grupo.quimol@uptc.edu.co](mailto:grupo.quimol@uptc.edu.co)

\* Correspondence: [jovanny.gomez@uptc.edu.co](mailto:jovanny.gomez@uptc.edu.co); [yeny.tobon-correa@univ-lille.fr](mailto:yeny.tobon-correa@univ-lille.fr) Tel.: +33(0)-320434901 (Y.T.)

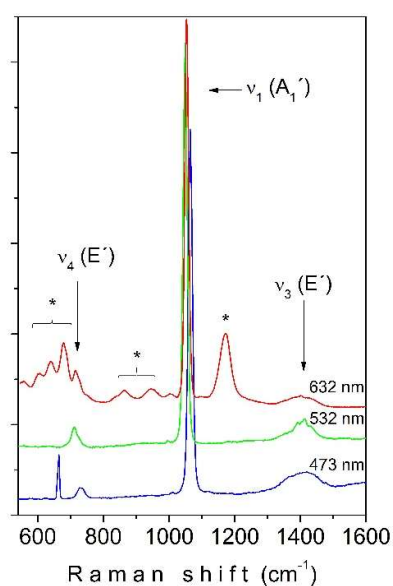

**Figure S1.** Raman spectra of a micro-droplet of aqueous NaNO<sub>3</sub> levitated optically in air using different excitation wavelengths. Additional signals (see asterisks) were observed around 600 cm<sup>-1</sup> in the spectra obtained using the excitation wavelengths of 632 and 473 nm, and around 900 and 1150 cm<sup>-1</sup> in the spectrum obtained using the excitation laser of 632 nm. These were determined as artefacts from the levitation 975 nm trap laser. These interferences can be limited by placing a laser clean-up filter to purify the 975 nm laser line.

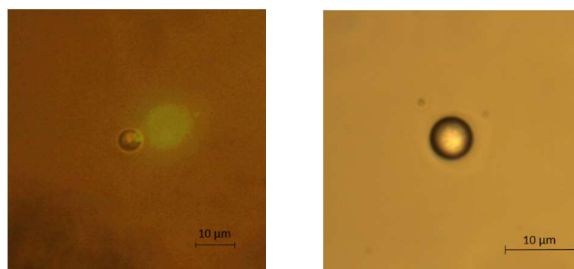

24 **Figure S2.** Visualization of an aqueous micro-droplet of  $\text{NaNO}_3$  optically levitated through the 50X  
25 Nikon objective of the confocal Raman microscope (left) and the 100X Nikon inverted immersion  
26 objective of the optical tweezer (right).
